1 Human Papillomavirus Type 16 E6 induces cell competition.

2

3 Nicole Brimer<sup>1</sup> and Scott Vande Pol <sup>#1</sup>

4

5

6

7

8

9

10 1. Department of Pathology, University of Virginia, Charlottesville, Virginia, USA

11

12 Running Head: HPV16 E6 induces cell competition

13

14 # Address correspondence to Scott Vande Pol, [vandepol@virginia.edu](mailto:vandepol@virginia.edu)

15

16

17

18

19 **Keywords:** HPV-16, p53, apoptosis, transformation, cancer, tumorigenicity.

20 **Abstract**

21 High risk human papillomavirus (HPV) infections induce squamous epithelial tumors in which  
22 the virus replicates. Initially, the virus-infected epithelial cells are untransformed, but expand in  
23 both number and area at the expense of normal squamous epithelial cells. How this occurs is  
24 unknown, but is presumed to be due to viral oncogene expression. We have developed an *in*  
25 *vitro* assay in which colonies of post-confluent HPV16 expressing cells outcompete confluent  
26 surrounding normal keratinocytes for surface area. The enhanced cell competition induced by  
27 the complete HPV16 genome is conferred by E6 expression alone, and not by individual  
28 expression of E5 or E7. In traditional oncogene assays, E7 is a more potent oncogene than E6,  
29 but such assays do not include interaction with normal surrounding cells. These new results  
30 separate classic oncogenicity that is primarily conferred by E7, from cell competition that we  
31 show is primarily conferred by E6, and provides a new biological role for E6 oncoproteins from  
32 high risk human papillomaviruses.

33 **Importance**

34 High risk papillomavirus infections induce epithelial tumors, some of which evolve into  
35 malignancies. The development and maintenance of cancer is due to the virally encoded E6  
36 and E7 oncoproteins. How a virally infected keratinocyte out-competes normal uninfected  
37 keratinocytes has been unknown. The present work shows that the enhanced competition of  
38 HPV16-infected cells is primarily due to the expression of the E6 oncoprotein and not the E7 or  
39 E5 oncoproteins. This work shows the importance of measuring oncoprotein traits in the  
40 context of cell competition with uninfected cells, and shows the potential of papillomavirus  
41 oncoproteins to be novel genetic probes for the analysis of cell competition.

42 **Introduction.**

43           Papillomaviruses induce epithelial hyperplasias (papillomas) in vertebrates, that can  
44 vary in size from visually inapparent up to kilogram masses (1). The virus replicates in the  
45 papilloma under the control of virus-encoded E1 and E2 proteins (2, 3). The virally-encoded E5,  
46 E6, and E7 oncoproteins contribute to the formation of the papilloma (4-6), and are expressed  
47 under the transcriptional control of cellular transcription factors together with the E1 and E2  
48 proteins (7-14). In some HPV types and in Bovine Papillomavirus type I, the complete  
49 papillomavirus replication cycle can be studied in vitro using keratinocyte organotypic culture  
50 and cloned viral DNA (15-19).

51           The papillomavirus infection cycle begins with exposure of basal epithelial cells and the  
52 basement membrane to a virus inoculum; virus associates with the basement membrane, is  
53 taken up by basal epithelial cells, and early genes including the viral oncoproteins are expressed  
54 (20). The initially infected cell(s) must attach to and persist on the basement membrane,  
55 because if the attachment is lost, initially virus infected cell(s) could be forced apically by other  
56 basal proliferating cells, resulting in the loss of the infected cell by desquamation from the  
57 epithelial surface. Therefore, attachment to the basement membrane and the ability of  
58 daughter cells to remain attached and proliferate at the expense of surrounding uninfected  
59 epithelium is a requirement for an incipient papilloma to expand. How virally infected cells  
60 compete at the expense of uninfected keratinocytes is presumably (but as yet unproven to be)  
61 a consequence of viral oncoprotein expression; but which oncoprotein(s) most influence cell  
62 competition is as yet unknown.

63 Cell competition is a rapidly expanding field that originated from the observation that  
64 normal cells in *Drosophila* embryos eliminate adjacent cells that are impaired but viable (due to  
65 having only a single copy of a ribosomal protein gene) ((21) and references therein). In cell  
66 competition, normal cells eliminate cells with reduced fitness. Described mechanisms include  
67 the induction of apoptosis, mechanical competition, and intercellular signaling that induces  
68 differentiation (recently reviewed in (22, 23)). While the hallmark of cell competition is normal  
69 cells eliminating impaired cells, abnormal super-competing cells can eliminate normal cells as is  
70 seen when super-competing cells produced by overexpression of c-myc can induce the  
71 displacement or death of normal surrounding cells (24, 25). Since papillomaviruses induce  
72 papillomas that expand at the expense of normal tissues, viral manipulation of cell competition  
73 may play a role. The viral oncoproteins E5, E6, and E7 would be candidates to manipulate cell  
74 competition. These viral oncoproteins have been characterized by classic oncoprotein assays  
75 such as focus formation, inducing anchorage independent growth of 3T3 cells, or transgenic  
76 expression in murine skin, all of which are all assays that measure the oncoprotein's traits in  
77 homogenous cell populations. Such assays do not recapitulate the early stages of an in vivo  
78 infection where a virally infected cell population expands by successfully competing against  
79 normal cells for space to form a lesion.

80 In classic assays for oncogene activity, the major oncogene of HPV16 is 16E7, which  
81 when compared to 16E6, has increased ability to induce anchorage independent colonies (26,  
82 27) and induces a more severe dysplasia than 16E6 when expressed in the skin of mice (28-30).  
83 The E7 oncoproteins are best known for targeting the degradation of Retinoblastoma family  
84 proteins (31-33) and the tyrosine phosphatase PTPN14 that is a negative regulator of Hippo

85 signaling (34-36). If the ability of HPV16 genomes to induce enhanced cell competition were  
86 due to oncogenic potency, E7 would seem to be the most likely candidate. However, in  
87 experiments presented here we find that it is HPV16 E6 and not E7 or E5 that independently  
88 enhances cell competition.

89

90

91 **Materials and Methods:**

92 **Cell culture.** NIKS Keratinocytes are human foreskin keratinocytes that are both feeder-cell and  
93 growth-factor dependent for proliferation, support the complete HPV lifecycle, are

94 untransformed, and have an extended lifespan (37); they were obtained from ATCC

95 (<https://www.atcc.org>). NIKS were co-cultured with mitomycin C treated 3T3 cells in F-media

96 and transduced with replication defective lentiviruses and with replication defective murine

97 retroviruses as previously described (38). NIKS cells were transfected with re-circularized

98 cloned HPV16; episomal status of the HPV16 genome was confirmed by southern blot (39).

99 Primary keratinocytes were derived from anonymous discarded neonatal foreskins collected

100 from the University of Virginia Medical Center and classified as non-human subject research,

101 and were maintained and virally transduced in F-media with mitomycin C treated 3T3 cells and

102 Rho Kinase inhibitor (Y-27632, ThermoFisher) as previously described (40).

103 **Plasmids.** HPV16 nts 56-879 encompassing the E6 and E7 region cloned into murine retrovirus

104 vector pLXSN was the kind gift of Denise Galloway (41). Stop codons were introduced at amino

105 acid 12 of E6 and amino acid 8 of E7 either alone or in combination as shown in the figures.

106 HPV16 E5 cloned into a retroviral expression vector was the kind gift of Richard Schlegel

107 (Georgetown University) (42). EGFP (from Clontech) or Fusion Red ((43) obtained from

108 Addgene clone 54778) were cloned into a lentiviral packaging plasmid with an internal MSCV

109 promoter and puromycin selection.

110 **Cell Competition Assay.** Primary Keratinocytes cultured in F media in the presence of Y-27632,

111 or NIKS cells, or HPV16 transfected NIKS cells, were cultured in F media with feeder cells as

112 described above. Keratinocytes transduced with either the EGFP or Fusion Red lentivirus were  
113 then transduced with the above-described murine retroviruses expressing either wild-type or  
114 mutated 16E6, and/or 16E7 or 16E5 and drug-selected in F media with puromycin and G418  
115 (and in the case of primary cells, 10 uM Y-27632). One day before the beginning of the assay,  
116 99.5% to 99.9% vector-expressing cells and 0.1 to 0.5% oncogene-expressing cells in contrasting  
117 fluorescent tagged cells were mixed and plated together at 10% confluency in a 10 cm dish. 24  
118 hours later, those cells were trypsinized and re-plated onto glass coverslips in a 6 well plate (at  
119  $2.1 \times 10^4$  cells / cm<sup>2</sup>) together with mitomycin-C treated feeder 3T3 cells in F media (with or  
120 without Y27632). Cells typically reached confluency at day 5-7, at which point one well is fixed  
121 and a second well is fed on alternate days with F-media for another 7 days until fixation and a  
122 third well fixed on days 17-21. Coverslips were stained with dapi. Fluorescent images were  
123 acquired as 16-bit TIFF images with a Nikon inverted TE-2000-E fluorescence microscope  
124 equipped with a Retiga6 camera (Photometrics.com) controlled by Oculus software. Pictures of  
125 fluorescent colonies were taken from randomly selected fields and the relative size of the  
126 colonies ascertained using Fiji image analysis software (<https://ImageJ.github.io>).

127 **Western Blotting.** SDS-lysed keratinocyte cell lysates were equalized for protein concentration  
128 (BioRad). Equal amounts of protein-normalized samples were loaded onto SDS-acrylamide gels,  
129 electrophoresed, and transferred onto PVDF membranes. Blots were blocked in 0.05% tween-  
130 20/5% Non-fat milk in Tris-buffered saline and probed with the indicated antibodies from Cell  
131 Signaling: GAPDH (#3683), Tubulin (#T9026); from BD Biosciences: anti-AU1 tag monoclonal  
132 antibody was a gift of Richard Schlegel (Georgetown University), Actin (ACTN05) (MS-1295-P1),  
133 p53 (MA1-19055); anti-16E6 mAb 6G6 was a kind gift of Johannes Schweitzer (Arbor Vita Corp.)

134 and anti-16E7 was a mix of both monoclonal antibody clones 8C9 and EDV7 (Santa Cruz  
135 Biotechnology).  
136



137 **Results**

138 **HPV16 confers enhanced cell competition to keratinocytes.** An assay was developed to  
139 measure the relative fitness of keratinocytes harboring HPV16 in competition with uninfected  
140 keratinocytes. The assay mimics the early stage of an HPV16 infection where an infected  
141 keratinocyte establishes a nascent papilloma and is illustrated in Fig. 1. 0.1 to 0.5% HPV16  
142 transfected and fluorescently-tagged keratinocytes are seeded together with 99.5- 99.9%  
143 vector-transduced keratinocytes fluorescently tagged with a contrasting colored protein at low  
144 density into a 10 cm dish for 24 hrs. before trypsinization and re-seeding of the mixed cell  
145 population together onto coverslips in a 6-well plate. The 24 hr. co-culture in the 10 cm plate  
146 insures that both populations begin the cell competition assay on glass coverslips under  
147 identical culture conditions. Confluency is reached about 5-7 days after seeding onto  
148 coverslips, at which time one coverslip is fixed and dapi stained, and the remaining coverslips  
149 are cultured for a further 7-14 days with feeding on alternate days (becoming super-confluent),  
150 and then are fixed and stained with dapi. Daily feeding of the coverslips leads to more rapid  
151 super-confluency and a shorter assay duration. A variety of fluorescent proteins were screened  
152 for this assay (EGFP, Fusion Red, mCherry, mCitrine, mVenus, and mCerulean) with EGFP and  
153 Fusion Red being chosen both for similar toxicity and spectral properties. The assay duration is  
154 limited by eventual stratification of epithelial cells into multicellular ridges that develop auto-  
155 fluorescence and interfere with fluorescence imaging. Pictures were taken of random fields  
156 and the relative size of colonies calculated. As super confluency is reached, the 3T3 feeder cells  
157 in the culture are forced off the plate by the keratinocytes and auto-fluoresce; these balls of  
158 auto-fluorescent cells were excluded from analysis.

159 If HPV16 conferred no competitive advantage, the colony sizes should not exceed those  
160 of vector transduced cells (Fig. 1), but that was not the case (Fig. 2). HPV16-expressing red  
161 keratinocyte colonies expanded in surface area at the expense of surrounding vector-  
162 transduced green cells, while red vector-transduced cells only modestly out-competed green  
163 cells (Fig. 2c, d, k).

164 **E6 and E7 proteins phenocopy enhanced competition caused by the complete HPV16**

165 **genome.** HPV16 encodes E5, E6, and E7 oncoproteins as well as RNA products that encode  
166 additional proteins and could have additional non-proteinaceous functions. In most cervical  
167 cancers, only the E6 and E7 genes are expressed after viral integration in the E2 or E1 genes (44,  
168 45). In order to determine if only the E6 and E7 proteins are sufficient to confer enhanced cell  
169 competition, retroviral vectors expressing the HPV16 E6 and E7 proteins were introduced into  
170 red keratinocytes while an identical E6 and E7 expression vector with stop codons introduced  
171 early in the E6 and E7 ORFs was introduced into the green cells in order to insure that the red  
172 and green cells express common RNA products and drug selection markers, and differ only in  
173 the expression of E6 and E7 proteins and fluorescent markers. Fig. 2e, f, and k show that E6  
174 together with E7 proteins alone conferred enhanced cell competition. Thus, neither E5 nor  
175 other virally encoded functions in HPV16 are essential for enhanced cell competition conferred  
176 by the HPV16 genome.

177 **16E6 predominantly confers enhanced cell competition compared to E7.** The indicated

178 retroviral constructions in Fig. 2 were used to express only E6 or only E7 in red cells compared  
179 to green cells. While 16E6-expressing red keratinocytes outcompeted green vector-transduced  
180 keratinocytes, 16E7-expressing keratinocyte colonies were smaller than vector-transduced

181 keratinocytes (although the smaller colony size did not reach statistical significance). The  
182 absence of enhanced cell competition by 16E7 was not due to an absence of E7 expression as  
183 both oncoproteins were expressed where expected and not where mutated (Fig. 2l). The  
184 differences in cell competition were quantified as differences in the size of the keratinocyte  
185 colonies as ascertained by automated quantification of randomly selected microscopic fields  
186 and reached high statistical significance (Fig. 2k).

187 To confirm that the results of Fig 2 were not the result of different fluorescent protein  
188 tags, the Fig. 2 assay was repeated with the oncoproteins expressed in green cells and the  
189 surrounding competing cells tagged with Fusion Red. Fig. 3 shows similar competition results  
190 regardless of green or red fluorescent tags employed.

191 **16E6 alone confers enhanced competition.** The ability of the 16E6 ORF alone to enhance cell  
192 competition did not distinguish between the full length E6 protein or a smaller E6 protein  
193 termed E6\*, where the E6\* mRNA encodes the first 41 amino acids of 16E6, splices and  
194 terminates two amino acids later. Additionally, the absence of the E5 ORF in the retroviral  
195 E6/E7 retrovirus used in Fig. 2 left out the possibility that E5 might enhance cell competition.  
196 To address this and confirm the validity of the Fig. 2 results, red keratinocytes were transduced  
197 with retroviruses expressing only the individual E5, E6\*, E6, E7 and E6 with a stop codon at aa  
198 12 (as the negative control) and set into competition with green keratinocytes transduced with  
199 the corresponding null-expression retroviral vector. Fig. 4 shows that 16E6 markedly increased  
200 cell competition while E6\*, 16E5, and 16E7 did not.

201 To assure ourselves that simply tagging with fluorescent proteins did not impair cell  
202 competition by the surrounding keratinocytes, non-coding vector, HPV16 and 16E6 were

203 introduced into EGFP expressing cells and set into competition against untagged keratinocytes  
204 in the same manner as shown in Fig. 2. Fig. 4 shows that EGFP labeled cells expressing either  
205 HPV16 or 16E6 competed efficiently against unlabeled keratinocytes.

206 We wished to ensure that the above observed results obtained in NIKS keratinocytes  
207 reflected the properties of primary keratinocytes. There is difficulty in transducing primary  
208 keratinocytes with non-transforming retroviruses as these primary cells senesce after several  
209 culture passages. To overcome this difficulty, we cultured and transduced primary  
210 keratinocytes in F media containing the rho kinase inhibitor Y-27632, which immortalizes  
211 primary keratinocytes as long as the drug is continuously present, with the cells resuming a  
212 normal cultured-cell limited lifespan when the drug is withdrawn (40). We transduced and  
213 selected primary keratinocytes in the presence of Y-27632, then continued or removed the drug  
214 after the cells were plated onto glass coverslips. Results were quite similar to results obtained  
215 in NIKS with the exception that cell spreading was larger and colonies where Y-27632 was  
216 removed were larger and less cohesive than colonies where Y-27632 was maintained  
217 throughout the assay. E6 alone enhanced colony sizes while E7 did not (Fig. 6). Western blots  
218 confirmed the expected protein expressions.

219

## 220 **Discussion**

221           When a papillomavirus infects a basal keratinocyte, the retention of the infected  
222 keratinocyte on the basement membrane and expansion of that keratinocyte's progeny on the  
223 basement membrane at the expense of surrounding keratinocytes is a prerequisite for the  
224 formation of a papilloma. Why papillomaviruses make papillomas at all is curious, and a priori  
225 seems unnecessary, but a papilloma would protect virus-producing cells from possibly  
226 deleterious interaction with uninfected cells. The interior of a papilloma physically segregates  
227 virus producing cells from contact with uninfected keratinocytes where that interaction might  
228 reduce the yield of virus, possibly through cell competition against cells that might be impaired  
229 by replication of virus. Our study indicates that expression of E6 in adherent cells in tissue  
230 culture confers a competitive advantage.

231           Key regulatory factors that influence cell competition during *Drosophila* development  
232 are proteins that in mammalian cells are found in complexes with high-risk papillomavirus E6  
233 oncoproteins, including p53 (46-49), c-myc (50-54), and cellular PDZ proteins like SCRIB, DLG1,  
234 and dPTPMEG (the *Drosophila* homolog of PTPN3) (48, 55-59). Alteration of signaling pathways  
235 that influence cell competition in *Drosophila* are also altered by high-risk HPV E6 proteins  
236 including WNT (60, 61), p13K/AKT and the Hippo pathway (59, 62, 63). E6 proteins have traits  
237 implicated in cell attachment and possibly cell competition; we have previously shown that the  
238 HPV16 E6 (16E6) oncoprotein enhances cell attachment and cell spreading in keratinocytes by  
239 targeted degradation of p53 (38), which could contribute to enhanced cell competition.

240           It is surprising that only 16E6 clearly scored in our assay and this should be cautiously  
241 interpreted. The assay we developed was designed to illuminate competition for surface area  
242 as we hypothesize would be found early in the infectious cycle. The assay is quite sensitive, and  
243 it is important to make sure that the competing cell populations are as nearly equivalent as  
244 possible with respect to drug selection markers and expressed genes; this is why we included  
245 genes with early stop codons in competing cells. Some fluorescent protein tags differed in  
246 toxicity and were unsuitable pairs for this assay. The density at which cells are plated onto the  
247 glass coverslips was important because higher initial cell density resulted in reduced adhesion  
248 of the keratinocytes, with loss of monolayer adhesion prior to the end of the assay. Different  
249 types of cell competition assays (such as those in which cells are admixed and cultured together  
250 and/or passaged together) might give rise to differing results; those assays include additional  
251 traits such as rate of cell proliferation and efficiency of cell attachment over multiple tissue  
252 culture passages. Different culture conditions such as growth factor concentrations, matrix  
253 composition, and substrate stiffness might reveal a role for either E5 or E7 that we did not  
254 observe.

255           The lack of clear competition conferred by E7 in our assay is surprising given that 16E7  
256 scores much more strongly than 16E6 in both anchorage independence of murine 3T3 cells in  
257 culture, and dysplasia in transgenic mice, both being traits that so far have measured E7 traits  
258 in the absence of interaction with normal keratinocytes (26-30). It is possible that less than  
259 optimal expression levels of 16E7 from retroviruses compared to the HPV genome also might  
260 have masked a possible contribution by 16E7.

261           The lack of cell competition conferred by 16E5 in our assay is also in the context of  
262 isolated expression, and results might differ when expressed from the HPV16 genome together  
263 with E6. 16E5 overexpression in transgenic murine skin generates differentiation abnormalities  
264 that require EGFR signaling (64) and in transgenic mice, E5 potentiates chemical carcinogenesis  
265 (65). Again, it is noteworthy that such transgenic mouse assays (where all keratinocytes  
266 express the oncogene) excludes interaction of the oncogene-expressing cells with surrounding  
267 normal keratinocytes, and there is a natural investigator bias towards the selection of founder  
268 mice with visual abnormalities. It is possible that in cells harboring the episomal HPV16  
269 genome that 16E5 might synergize with E6 to augment cell competition under as-yet undefined  
270 conditions, and that such a putative contribution would be lost upon integration of the genome  
271 into the cellular chromosome during progression to cancer. Neither E5 nor E7 are required for  
272 episomal maintenance of HPV16 in keratinocytes (66, 67), but E6 is required (19, 68, 69),  
273 making a genetic dissection of E6 in the context of the HPV16 genome problematic.

274           A genetic analysis of the effect of 16E6 on cell competition is underway, and may be  
275 complex. As noted above, 16E6 has multiple interactions with cellular proteins, many of which  
276 are candidates to mediate cell competition. 16E6 targets the degradation of p53 which has  
277 been implicated in differential competition where winner cells express lower levels of p53 (48),  
278 but while high-risk HPV E6 proteins target p53, most genera of papillomaviruses produce  
279 papillomas and do not target p53 degradation. Multiple alpha-like genera of E6 proteins do  
280 target the degradation of NHERF1 which is a negative regulator of canonical WNT signaling, and  
281 enhanced WNT signaling has been shown to enhance cell competition (70). Hippo signaling  
282 and PDZ proteins such as SCRIB and DLG that interact with 16E6 have also been implicated in

283 modulating cell competition (57, 71), so it is possible that multiple 16E6 interactions may act  
284 together to influence competition in ways that are difficult to predict and may vary by assay  
285 conditions or the cell types infected.

286         There is a split in the evolutionary papillomavirus tree between virus types that encode  
287 E6 proteins that associate with the cellular E3 ubiquitin ligase E6AP (UBE3A) (72) and  
288 papillomavirus types where E6 proteins associate with MAML1 transcriptional co-activators and  
289 thereby repress Notch signaling (73-76). E6 proteins that associate with MAML1 may also  
290 associate with paxillin, a cellular adapter protein that regulates cell attachment via integrin  
291 signaling (77-80); the expression of paxillin is required for transformation by the BPV-1 E6  
292 protein that interacts with both paxillin and MAML1 (81). Since Notch signaling controls  
293 squamous cell differentiation and carcinogenesis (82) and MAML1 is the transcriptional effector  
294 of Notch, the association of many E6 proteins with MAML1 could be a candidate interaction for  
295 influencing cell competition. Interestingly, targeted expression of a dominant negative MAML1  
296 in the basal squamous epithelium of murine esophagus induces cell competition (83). This  
297 suggests that HPV E6 proteins that interact with MAML1 from beta and gamma genera might  
298 induce cell competition through repression of notch signaling (73, 74). If so, this would suggest  
299 the possibility that enhanced cell competition could be a broadly manifested property of E6  
300 proteins.

301         Since it is now reasonable to propose that enhanced cell competition is a papillomavirus  
302 trait, a detailed genetic analysis of diverse papillomavirus oncoproteins in cell competition  
303 assays may offer broad new insights into the mechanisms by which squamous cell competition  
304 can be regulated.





306 **Funding Information**

307 This work was supported by National Cancer Institute funding RO1CA134737 to S.V. and by  
308 institutional support from the University of Virginia. The funders had no role in study design,  
309 data collection and analysis, decision to publish or preparation of the manuscript.

310

311

312 **Acknowledgements**

313

314 **Figure Legends.**

315 **Fig.1. An in vitro model for papillomavirus infected cell competition.** Keratinocytes were  
316 labeled by lentiviral transduction with either green (eGFP) or red (Fusion Red) proteins and  
317 then transduced with either vector or papillomavirus expressing retroviruses and cultured  
318 separately. On day 1 of the assay, 99.9% vector-expressing green cells and 0.1% oncogene  
319 expressing red cells were mixed and plated together at 10% confluency in a 10 cm dish. 24  
320 hours later, those cells were trypsinized and each sample was plated onto 3 glass coverslips in a  
321 6 well plate ( $2.1 \times 10^4$  cells /  $\text{cm}^2$ ). Cells reach confluency by day 5-7 at which point one well is  
322 fixed and a second well is fed daily with F-media for another 7 days and then fixed, and a third  
323 well incubated for another 7 days before fixation, and staining with dapi. Pictures of  
324 fluorescent colonies were taken with a 4X objective from randomly selected fields and the  
325 relative size of the colonies ascertained using NIH ImageJ software.

326

327 **Fig.2. Enhanced cell competition is induced by HPV16 and by HPV16 E6.** Vector-transduced  
328 green cells and oncogene-expressing red cells were seeded together as described in Fig. 1 onto  
329 coverslips on day 2 and fixed at confluency on day 5 (a, c, e, g, i); a second coverslip was fixed  
330 on day 12 (b, d, f, h, j). The transduced genes are indicated to the right of each pair. The  
331 quantified results of colony sizes (in arbitrary units) from 2 experiments is shown (k). Western  
332 blots for the stably transduced cell lines selected in Fusion Red expressing cells is shown (l).  
333 HPV16 and E6 confer enhanced cell colony size at day 12 while E7 does not. Day 5 colony sizes  
334 were not statistically different between the samples and are not shown. Error bars in part k

335 depict standard error of the mean for colony sizes. The two assays shown are representative of  
336 4 assays.

337

338 **Fig. 3. Cell competition induced by HPV16 or HPV16 E6 alone is similar in competing cells**  
339 **expressing either EGFP or Fusion Red tags.** The same oncogene transductions shown in Fig. 2  
340 were expressed in either Fusion Red (a) or EGFP tagged cells (b) and put into competition with  
341 the alternate colored cells as shown and described in Fig. 2. Colony sizes are shown in arbitrary  
342 units and error is standard error of the mean. \*\*\*\* is  $P < 0.0001$ ; n.s. is not significant.

343

344 **Fig. 4. Fluorescent tagging of competing keratinocytes does not prevent cell competition by**  
345 **16E6 expressing keratinocytes.** EGFP-tagged NIKS cells expressing either 16E6 or the complete  
346 episomal HPV16 genome compete efficiently against un-tagged NIKS cells. Relative colony sizes  
347 on day 17 are shown in arbitrary units (g) and error bars represent standard error of the mean.  
348 \*\*\*\* is  $P < 0.0001$ ; n.s. is not significant.

349

350 **Fig. 5. 16E6 induces cell competition while 16E6\*, 16E7 and 16E5 do not.** The individual  
351 HPV16 oncoproteins were retrovirally transduced into Fusion-Red tagged NIKS cells and set into  
352 competition against EGFP-tagged NIKS cells as described in Fig. 1; E5 (e, f), E6 (c, d), E6\* (g, h)  
353 and E7 (i, j). 16E6 with a stop codon at amino acid 12 (L12X, a and b) was the negative vector  
354 control. Plates were stained at day 6 when confluent and day 17 when super-confluent.  
355 Pictures were taken with a 4X objective and relative colony sizes ascertained at day 17 and  
356 shown in arbitrary units (k). Expression of the papillomavirus oncoproteins in the same cell

357 lines used in this experiment is shown in part I where the blot was sequentially probed with  
358 monoclonal antibodies to E7, E6, and the AU1 epitope on E5 and finally GAPDH in that order.  
359 Day 6 colony sizes were not statistically different between the samples and are not shown.  
360 Error bars represent standard error of the mean. \*\*\*\* is  $P < 0.0001$ ; n.s. is not significant. The  
361 results shown are representative of 4 assays.

362

363 **Fig. 6. Cell competition is induced by E6 in primary keratinocytes.** Primary foreskin  
364 keratinocytes maintained in the presence of the rho kinase inhibitor Y-27632 were transduced  
365 with the indicated fluorescent proteins and oncogenes as shown in Fig. 2, and seeded onto  
366 glass coverslips as described in Fig. 1. One set was maintained in media supplemented with Y-  
367 27632 (a, c, e, g, i), but in a duplicate set Y-27632 was removed after seeding onto glass  
368 coverslips (b, d, f, h, j). Cells were fixed and stained with dapi on day 21 and red colony sizes  
369 ascertained by quantitation of photomicrographs in arbitrary units. Error bars represent the  
370 variation in colony sizes, and denote standard error of the mean. \*\*\* is  $P < 0.001$ ; \*\* is  
371  $P < 0.01$ ; n.s. is not significant. Western blots for expression of p53, actin, 16E6, 16E7, and  
372 GAPDH are shown from cells growing in the presence or absence of Y-27632 in parts k and l  
373 respectively. Results shown are representative of 4 experiments.

374

375 **References**

376

- 377 1. Knipe D, Howley PM. Virology. Lippincott Williams and Wilkins; 2007. p. 1662.
- 378 2. Bergvall M, Melendy T, Archambault J. The E1 proteins. Virology. 2013;445(1-2):35-56. Epub  
379 2013/09/14. doi: 10.1016/j.virol.2013.07.020. PubMed PMID: 24029589; PMCID: PMC3811109.
- 380 3. McBride AA. The papillomavirus E2 proteins. Virology. 2013;445(1-2):57-79. doi:  
381 10.1016/j.virol.2013.06.006. PubMed PMID: 23849793; PMCID: PMC3783563.
- 382 4. Brandsma JL, Yang ZH, Barthold SW, Johnson EA. Use of a rapid, efficient inoculation method to  
383 induce papillomas by cottontail rabbit papillomavirus DNA shows that the E7 gene is required. Proc Natl  
384 Acad Sci U S A. 1991;88(11):4816-20. PubMed PMID: 1647019; PMCID: 51757.
- 385 5. Wu X, Xiao W, Brandsma JL. Papilloma formation by cottontail rabbit papillomavirus requires E1  
386 and E2 regulatory genes in addition to E6 and E7 transforming genes. J Virol. 1994;68(9):6097-102. Epub  
387 1994/09/01. doi: 10.1128/JVI.68.9.6097-6102.1994. PubMed PMID: 8057490; PMCID: PMC237021.
- 388 6. Brandsma JL, Yang ZH, DiMaio D, Barthold SW, Johnson E, Xiao W. The putative E5 open reading  
389 frame of cottontail rabbit papillomavirus is dispensable for papilloma formation in domestic rabbits. J  
390 Virol. 1992;66(10):6204-7. Epub 1992/10/01. doi: 10.1128/JVI.66.10.6204-6207.1992. PubMed PMID:  
391 1326666; PMCID: PMC283673.
- 392 7. Bernard HU. Regulatory elements in the viral genome. Virology. 2013;445(1-2):197-204. Epub  
393 2013/06/04. doi: 10.1016/j.virol.2013.04.035. PubMed PMID: 23725692.
- 394 8. Schwartz S. Papillomavirus transcripts and posttranscriptional regulation. Virology. 2013;445(1-  
395 2):187-96. Epub 2013/05/28. doi: 10.1016/j.virol.2013.04.034. PubMed PMID: 23706315.
- 396 9. Vande Pol S, Howley PM. A bovine papillomavirus constitutive enhancer is negatively regulated  
397 by the E2 repressor through competitive binding for a cellular factor. J Virol. 1990;64(5420):5420-9.

- 398 10. Thierry F, Howley PM. Functional analysis of E2-mediated repression of the HPV18 P105  
399 promoter. *New Biol.* 1991;3(90):90-100.
- 400 11. Romanczuk H, Howley PM. Disruption of either the E1 or the E2 regulatory gene of human  
401 papillomavirus type 16 increases viral immortalization capacity. *Proc Natl Acad Sci U S A.*  
402 1992;89(7):3159-63.
- 403 12. Thierry F. Transcriptional regulation of the papillomavirus oncogenes by cellular and viral  
404 transcription factors in cervical carcinoma. *Virology.* 2009;384(2):375-9. Epub 2008/12/10. doi:  
405 10.1016/j.virol.2008.11.014. PubMed PMID: 19064276.
- 406 13. Sandler AB, Vande Pol SB, Spalholz BA. Repression of bovine papillomavirus type 1 transcription  
407 by the E1 replication protein. *J Virol.* 1993;67(9):5079-87.
- 408 14. Vande Pol S, Howley P. Negative regulation of the bovine papillomavirus E5, E6, and E7  
409 oncogenes by the viral E1 and E2 genes. *J Virol.* 1995;69:395-402.
- 410 15. Meyers C, Frattini MG, Hudson JB, Laimins LA. Biosynthesis of human papillomavirus from a  
411 continuous cell line upon epithelial differentiation. *Science.* 1992;257(5072):971-3. Epub 1992/08/14.  
412 doi: 10.1126/science.1323879. PubMed PMID: 1323879.
- 413 16. McBride AA, Dlugosz A, Baker CC. Production of infectious bovine papillomavirus from cloned  
414 viral DNA by using an organotypic raft/xenograft technique. *Proc Natl Acad Sci U S A.* 2000;97(10):5534-  
415 9. PubMed PMID: 10805809.
- 416 17. Oh ST, Longworth MS, Laimins LA. Roles of the E6 and E7 proteins in the life cycle of low-risk  
417 human papillomavirus type 11. *J Virol.* 2004;78(5):2620-6. PubMed PMID: 14963169.
- 418 18. Lee C, Laimins LA. Role of the PDZ domain-binding motif of the oncoprotein E6 in the  
419 pathogenesis of human papillomavirus type 31. *J Virol.* 2004;78(22):12366-77. PubMed PMID:  
420 15507623.

- 421 19. Thomas JT, Hubert WG, Ruesch MN, Laimins LA. Human papillomavirus type 31 oncoproteins E6  
422 and E7 are required for the maintenance of episomes during the viral life cycle in normal human  
423 keratinocytes. *Proc Natl Acad Sci U S A*. 1999;96(15):8449-54.
- 424 20. Schiller JT, Day PM, Kines RC. Current understanding of the mechanism of HPV infection.  
425 *Gynecol Oncol*. 2010;118(1 Suppl):S12-7. Epub 2010/06/04. doi: 10.1016/j.ygyno.2010.04.004. PubMed  
426 PMID: 20494219; PMCID: PMC3493113.
- 427 21. Tyler DM, Li W, Zhuo N, Pellock B, Baker NE. Genes affecting cell competition in *Drosophila*.  
428 *Genetics*. 2007;175(2):643-57. Epub 2006/11/18. doi: 10.1534/genetics.106.061929. PubMed PMID:  
429 17110495; PMCID: PMC1800612.
- 430 22. Baker NE. Emerging mechanisms of cell competition. *Nat Rev Genet*. 2020;21(11):683-97. Epub  
431 2020/08/12. doi: 10.1038/s41576-020-0262-8. PubMed PMID: 32778819.
- 432 23. Ellis SJ, Gomez NC, Levorse J, Mertz AF, Ge Y, Fuchs E. Distinct modes of cell competition shape  
433 mammalian tissue morphogenesis. *Nature*. 2019;569(7757):497-502. Epub 2019/05/17. doi:  
434 10.1038/s41586-019-1199-y. PubMed PMID: 31092920; PMCID: PMC6638572.
- 435 24. Moreno E, Basler K. dMyc transforms cells into super-competitors. *Cell*. 2004;117(1):117-29.  
436 Epub 2004/04/07. doi: 10.1016/s0092-8674(04)00262-4. PubMed PMID: 15066287.
- 437 25. Claveria C, Giovinazzo G, Sierra R, Torres M. Myc-driven endogenous cell competition in the  
438 early mammalian embryo. *Nature*. 2013;500(7460):39-44. Epub 2013/07/12. doi: 10.1038/nature12389.  
439 PubMed PMID: 23842495.
- 440 26. Vousden KH, Doniger J, DiPaolo JA, Lowy DR. The E7 open reading frame of human  
441 papillomavirus type 16 encodes a transforming gene. *Oncogene research*. 1988;3(2):167-75. PubMed  
442 PMID: 2852339.



- 443 27. Sedman S, Hubbert N, Vass W, Lowy D, Schiller J. Mutant p53 can substitute for human  
444 papillomavirus type 16 E6 in immortalization of human keratinocytes but does not have E6-  
445 associated trans-activation or transforming activity. *J Virol.* 1992;66:4201-8.
- 446 28. Griep AE, Herber R, Jeon S, Lohse JK, Dubielzig RR, Lambert PF. Tumorigenicity by human  
447 papillomavirus type 16 E6 and E7 in transgenic mice correlates with alterations in epithelial cell growth  
448 and differentiation. *J Virol.* 1993;67(3):1373-84. PubMed PMID: 8382301.
- 449 29. Song S, Pitot HC, Lambert PF. The human papillomavirus type 16 E6 gene alone is sufficient to  
450 induce carcinomas in transgenic animals. *J Virol.* 1999;73(7):5887-93.
- 451 30. Riley RR, Duensing S, Brake T, Munger K, Lambert PF, Arbeit JM. Dissection of human  
452 papillomavirus E6 and E7 function in transgenic mouse models of cervical carcinogenesis. *Cancer Res.*  
453 2003;63(16):4862-71. PubMed PMID: 12941807.
- 454 31. Boyer SN, Wazer DE, Band V. E7 protein of human papilloma virus-16 induces degradation of  
455 retinoblastoma protein through the ubiquitin-proteasome pathway. *Cancer Res.* 1996;56(20):4620-4.  
456 Epub 1996/10/15. PubMed PMID: 8840974.
- 457 32. Dyson N, Howley PM, Munger K, Harlow E. The human papilloma virus-16 E7 oncoprotein is able  
458 to bind to the retinoblastoma gene product. *Science.* 1989;243(4893):934-7.
- 459 33. Huh K, Zhou X, Hayakawa H, Cho JY, Libermann TA, Jin J, Harper JW, Munger K. Human  
460 papillomavirus type 16 E7 oncoprotein associates with the cullin 2 ubiquitin ligase complex, which  
461 contributes to degradation of the retinoblastoma tumor suppressor. *J Virol.* 2007;81(18):9737-47. doi:  
462 10.1128/JVI.00881-07. PubMed PMID: 17609271; PMCID: 2045412.
- 463 34. Liu X, Yang N, Figel SA, Wilson KE, Morrison CD, Gelman IH, Zhang J. PTPN14 interacts with and  
464 negatively regulates the oncogenic function of YAP. *Oncogene.* 2013;32(10):1266-73. doi:  
465 10.1038/onc.2012.147. PubMed PMID: 22525271; PMCID: PMC4402938.

- 466 35. Michaloglou C, Lehmann W, Martin T, Delaunay C, Hueber A, Barys L, Niu H, Billy E, Wartmann  
467 M, Ito M, Wilson CJ, Digan ME, Bauer A, Voshol H, Christofori G, Sellers WR, Hofmann F, Schmelzle T.  
468 The tyrosine phosphatase PTPN14 is a negative regulator of YAP activity. *PloS one*. 2013;8(4):e61916.  
469 doi: 10.1371/journal.pone.0061916. PubMed PMID: 23613971; PMCID: PMC3628344.
- 470 36. White EA, Munger K, Howley PM. High-Risk Human Papillomavirus E7 Proteins Target PTPN14  
471 for Degradation. *MBio*. 2016;7(5). doi: 10.1128/mBio.01530-16. PubMed PMID: 27651363; PMCID:  
472 PMC5030362.
- 473 37. Flores ER, Allen-Hoffmann BL, Lee D, Sattler CA, Lambert PF. Establishment of the human  
474 papillomavirus type 16 (HPV-16) life cycle in an immortalized human foreskin keratinocyte cell line.  
475 *Virology*. 1999;262(2):344-54.
- 476 38. Cooper B, Brimer N, Vande Pol SB. Human papillomavirus E6 regulates the cytoskeleton  
477 dynamics of keratinocytes through targeted degradation of p53. *J Virol*. 2007;81(22):12675-9. doi:  
478 10.1128/JVI.01083-07. PubMed PMID: 17804489; PMCID: 2168984.
- 479 39. Brimer N, Vande Pol SB. Papillomavirus E6 PDZ Interactions Can Be Replaced by Repression of  
480 p53 to promote Episomal HPV Genome Maintenance. *J Virol*. 2013. doi: 10.1128/JVI.02360-13. PubMed  
481 PMID: 24352452.
- 482 40. Chapman S, Liu X, Meyers C, Schlegel R, McBride AA. Human keratinocytes are efficiently  
483 immortalized by a Rho kinase inhibitor. *J Clin Invest*. 2010;120(7):2619-26. Epub 2010/06/03. doi:  
484 10.1172/JCI42297. PubMed PMID: 20516646; PMCID: PMC2898606.
- 485 41. Halbert CL, Demers GW, Galloway DA. The E7 gene of human papillomavirus type 16 is sufficient  
486 for immortalization of human epithelial cells. *J Virol*. 1991;65(1):473-8. PubMed PMID: 1845902.
- 487 42. Disbrow GL, Sunitha I, Baker CC, Hanover J, Schlegel R. Codon optimization of the HPV-16 E5  
488 gene enhances protein expression. *Virology*. 2003;311(1):105-14. Epub 2003/07/02. doi: 10.1016/s0042-  
489 6822(03)00129-6. PubMed PMID: 12832208.

- 490 43. Shemiakina, II, Ermakova GV, Cranfill PJ, Baird MA, Evans RA, Souslova EA, Staroverov DB,  
491 Gorokhovatsky AY, Putintseva EV, Gorodnicheva TV, Chepurnykh TV, Strukova L, Lukyanov S, Zaraisky  
492 AG, Davidson MW, Chudakov DM, Shcherbo D. A monomeric red fluorescent protein with low  
493 cytotoxicity. *Nature communications*. 2012;3:1204. Epub 2012/11/15. doi: 10.1038/ncomms2208.  
494 PubMed PMID: 23149748.
- 495 44. Schwarz E, Freese UK, Gissmann L, Mayer W, Roggenbuck B, Stremlau A, zur Hausen H. Structure  
496 and transcription of human papillomavirus sequences in cervical carcinoma cells. *Nature*.  
497 1985;314(6006):111-4. PubMed PMID: 2983228.
- 498 45. Baker CC, Phelps WC, Lindgren V, Braun MJ, Gonda MA, Howley PM. Structural and  
499 transcriptional analysis of human papillomavirus type 16 sequences in cervical carcinoma cell lines. *J*  
500 *Virology*. 1987;61(4):962-71.
- 501 46. Baker NE, Kiparaki M, Khan C. A potential link between p53, cell competition and ribosomopathy  
502 in mammals and in *Drosophila*. *Dev Biol*. 2019;446(1):17-9. Epub 2018/12/05. doi:  
503 10.1016/j.ydbio.2018.11.018. PubMed PMID: 30513308; PMCID: PMC6642609.
- 504 47. Bondar T, Medzhitov R. p53-mediated hematopoietic stem and progenitor cell competition. *Cell*  
505 *Stem Cell*. 2010;6(4):309-22. Epub 2010/04/07. doi: 10.1016/j.stem.2010.03.002. PubMed PMID:  
506 20362536; PMCID: PMC2872065.
- 507 48. Wagstaff L, Goschorska M, Kozyrska K, Duclos G, Kucinski I, Chessel A, Hampton-O'Neil L,  
508 Bradshaw CR, Allen GE, Rawlins EL, Silberzan P, Carazo Salas RE, Piddini E. Mechanical cell competition  
509 kills cells via induction of lethal p53 levels. *Nature communications*. 2016;7:11373. Epub 2016/04/26.  
510 doi: 10.1038/ncomms11373. PubMed PMID: 27109213; PMCID: PMC4848481.
- 511 49. Zhang G, Xie Y, Zhou Y, Xiang C, Chen L, Zhang C, Hou X, Chen J, Zong H, Liu G. p53 pathway is  
512 involved in cell competition during mouse embryogenesis. *Proc Natl Acad Sci U S A*. 2017;114(3):498-

- 513 503. Epub 2017/01/05. doi: 10.1073/pnas.1617414114. PubMed PMID: 28049824; PMCID:  
514 PMC5255589.
- 515 50. de la Cova C, Abril M, Bellosta P, Gallant P, Johnston LA. *Drosophila myc* regulates organ size by  
516 inducing cell competition. *Cell*. 2004;117(1):107-16. Epub 2004/04/07. doi: 10.1016/s0092-  
517 8674(04)00214-4. PubMed PMID: 15066286.
- 518 51. Fahey-Lozano N, La Marca JE, Portela M, Richardson HE. *Drosophila* Models of Cell Polarity and  
519 Cell Competition in Tumorigenesis. *Adv Exp Med Biol*. 2019;1167:37-64. Epub 2019/09/15. doi:  
520 10.1007/978-3-030-23629-8\_3. PubMed PMID: 31520348.
- 521 52. Mamada H, Sato T, Ota M, Sasaki H. Cell competition in mouse NIH3T3 embryonic fibroblasts is  
522 controlled by the activity of Tead family proteins and Myc. *J Cell Sci*. 2015;128(4):790-803. Epub  
523 2015/01/16. doi: 10.1242/jcs.163675. PubMed PMID: 25588835.
- 524 53. Nagata R, Igaki T. Cell competition: Emerging mechanisms to eliminate neighbors. *Dev Growth*  
525 *Differ*. 2018;60(9):522-30. Epub 2018/11/18. doi: 10.1111/dgd.12575. PubMed PMID: 30443922.
- 526 54. Patel MS, Shah HS, Shrivastava N. c-Myc-Dependent Cell Competition in Human Cancer Cells. *J*  
527 *Cell Biochem*. 2017;118(7):1782-91. Epub 2016/12/17. doi: 10.1002/jcb.25846. PubMed PMID:  
528 27982483.
- 529 55. Chen CL, Schroeder MC, Kango-Singh M, Tao C, Halder G. Tumor suppression by cell competition  
530 through regulation of the Hippo pathway. *Proc Natl Acad Sci U S A*. 2012;109(2):484-9. Epub  
531 2011/12/23. doi: 10.1073/pnas.1113882109. PubMed PMID: 22190496; PMCID: PMC3258595.
- 532 56. Kronen MR, Schoenfelder KP, Klein AM, Nystul TG. Basolateral junction proteins regulate  
533 competition for the follicle stem cell niche in the *Drosophila* ovary. *PloS one*. 2014;9(7):e101085. Epub  
534 2014/07/06. doi: 10.1371/journal.pone.0101085. PubMed PMID: 24991805; PMCID: PMC4084627.
- 535 57. Norman M, Wisniewska KA, Lawrenson K, Garcia-Miranda P, Tada M, Kajita M, Mano H,  
536 Ishikawa S, Ikegawa M, Shimada T, Fujita Y. Loss of Scribble causes cell competition in mammalian cells. *J*

- 537 Cell Sci. 2012;125(Pt 1):59-66. Epub 2012/01/18. doi: 10.1242/jcs.085803. PubMed PMID: 22250205;  
538 PMCID: PMC3269023.
- 539 58. Jing M, Bohl J, Brimer N, Kinter M, Vande Pol SB. Degradation of tyrosine phosphatase PTPN3  
540 (PTPH1) by association with oncogenic human papillomavirus E6 proteins. J Virol. 2007;81(5):2231-9.  
541 PubMed PMID: 17166906.
- 542 59. Webb Strickland S, Brimer N, Lyons C, Vande Pol SB. Human Papillomavirus E6 interaction with  
543 cellular PDZ domain proteins modulates YAP nuclear localization. Virology. 2018;516:127-38. Epub  
544 2018/01/19. doi: 10.1016/j.virol.2018.01.003. PubMed PMID: 29346075; PMCID: PMC5826896.
- 545 60. Bonilla-Delgado J, Bulut G, Liu X, Cortes-Malagon EM, Schlegel R, Flores-Maldonado C, Contreras  
546 RG, Chung SH, Lambert PF, Uren A, Gariglio P. The E6 oncoprotein from HPV16 enhances the canonical  
547 Wnt/beta-catenin pathway in skin epidermis in vivo. Molecular cancer research : MCR. 2012;10(2):250-  
548 8. doi: 10.1158/1541-7786.MCR-11-0287. PubMed PMID: 22160870; PMCID: 3332097.
- 549 61. Drews CM, Case S, Vande Pol SB. E6 proteins from high-risk HPV, low-risk HPV, and animal  
550 papillomaviruses activate the Wnt/beta-catenin pathway through E6AP-dependent degradation of  
551 NHERF1. PLoS Pathog. 2019;15(4):e1007575. Epub 2019/04/20. doi: 10.1371/journal.ppat.1007575.  
552 PubMed PMID: 31002735; PMCID: PMC6493770.
- 553 62. Spangle JM, Munger K. The human papillomavirus type 16 E6 oncoprotein activates mTORC1  
554 signaling and increases protein synthesis. J Virol. 2010;84(18):9398-407. doi: 10.1128/JVI.00974-10.  
555 PubMed PMID: 20631133; PMCID: 2937655.
- 556 63. He C, Mao D, Hua G, Lv X, Chen X, Angeletti PC, Dong J, Remmenga SW, Rodabaugh KJ, Zhou J,  
557 Lambert PF, Yang P, Davis JS, Wang C. The Hippo/YAP pathway interacts with EGFR signaling and HPV  
558 oncoproteins to regulate cervical cancer progression. EMBO molecular medicine. 2015;7(11):1426-49.  
559 doi: 10.15252/emmm.201404976. PubMed PMID: 26417066; PMCID: 4644376.

- 560 64. Genter Williams SM, Disbrow GL, Schlegel R, Lee D, Threadgill DW, Lambert PF. Requirement of  
561 epidermal growth factor receptor for hyperplasia induced by E5, a high-risk human papillomavirus  
562 oncogene. *Cancer Res.* 2005;65(15):6534-42. Epub 2005/08/03. doi: 10.1158/0008-5472.CAN-05-0083.  
563 PubMed PMID: 16061632.
- 564 65. Maufort JP, Williams SM, Pitot HC, Lambert PF. Human papillomavirus 16 E5 oncogene  
565 contributes to two stages of skin carcinogenesis. *Cancer Res.* 2007;67(13):6106-12. Epub 2007/07/10.  
566 doi: 10.1158/0008-5472.CAN-07-0921. PubMed PMID: 17616666; PMCID: PMC2858287.
- 567 66. Genter SM, Sterling S, Duensing S, Munger K, Sattler C, Lambert PF. Quantitative role of the  
568 human papillomavirus type 16 E5 gene during the productive stage of the viral life cycle. *J Virol.*  
569 2003;77(5):2832-42. PubMed PMID: 12584306.
- 570 67. Flores ER, Allen-Hoffmann BL, Lee D, Lambert PF. The human papillomavirus type 16 E7  
571 oncogene is required for the productive stage of the viral life cycle. *J Virol.* 2000;74(14):6622-31.  
572 PubMed PMID: 10864676; PMCID: 112172.
- 573 68. Bienkowska-Haba M, Luszczek W, Myers JE, Keiffer TR, DiGiuseppe S, Polk P, Bodily JM, Scott RS,  
574 Sapp M. A new cell culture model to genetically dissect the complete human papillomavirus life cycle.  
575 *PLoS Pathog.* 2018;14(3):e1006846. Epub 2018/03/02. doi: 10.1371/journal.ppat.1006846. PubMed  
576 PMID: 29494681; PMCID: PMC5833277.
- 577 69. Park RB, Androphy EJ. Genetic analysis of high-risk e6 in episomal maintenance of human  
578 papillomavirus genomes in primary human keratinocytes. *J Virol.* 2002;76(22):11359-64. PubMed PMID:  
579 12388696.
- 580 70. Gutierrez-Martinez A, Sew WQG, Molano-Fernandez M, Carretero-Junquera M, Herranz H.  
581 Mechanisms of oncogenic cell competition-Paths of victory. *Semin Cancer Biol.* 2020;63:27-35. Epub  
582 2019/05/28. doi: 10.1016/j.semcancer.2019.05.015. PubMed PMID: 31128299.

- 583 71. Nishio M, Miyachi Y, Otani J, Tane S, Omori H, Ueda F, Togashi H, Sasaki T, Mak TW, Nakao K,  
584 Fujita Y, Nishina H, Maehama T, Suzuki A. Hippo pathway controls cell adhesion and context-dependent  
585 cell competition to influence skin engraftment efficiency. *FASEB J.* 2019;33(4):5548-60. Epub  
586 2019/01/15. doi: 10.1096/fj.201802005R. PubMed PMID: 30640535.
- 587 72. Huibregtse JM, Scheffner M, Howley PM. Cloning and expression of the cDNA for E6-AP, a  
588 protein that mediates the interaction of the human papillomavirus E6 oncoprotein with p53. *Mol Cell*  
589 *Biol.* 1993;13(2):775-84.
- 590 73. Brimer N, Lyons C, Wallberg AE, Vande Pol SB. Cutaneous papillomavirus E6 oncoproteins  
591 associate with MAML1 to repress transactivation and NOTCH signaling. *Oncogene.* 2012;31(43):4639-46.  
592 doi: 10.1038/onc.2011.589. PubMed PMID: 22249263; PMCID: 3330202.
- 593 74. Tan MJ, White EA, Sowa ME, Harper JW, Aster JC, Howley PM. Cutaneous beta-human  
594 papillomavirus E6 proteins bind Mastermind-like coactivators and repress Notch signaling. *Proc Natl*  
595 *Acad Sci U S A.* 2012;109(23):E1473-80. Epub 2012/05/02. doi: 1205991109 [pii]  
596 10.1073/pnas.1205991109. PubMed PMID: 22547818; PMCID: 3384212.
- 597 75. Meyers JM, Spangle JM, Munger K. The HPV8 E6 protein interferes with NOTCH activation  
598 during keratinocyte differentiation. *J Virol.* 2013. doi: 10.1128/JVI.02527-12. PubMed PMID: 23365452;  
599 PMCID: 3624394.
- 600 76. Brimer N, Drews CM, Vande Pol SB. Association of papillomavirus E6 proteins with either  
601 MAML1 or E6AP clusters E6 proteins by structure, function, and evolutionary relatedness. *PLoS Pathog.*  
602 2017;13(12):e1006781. doi: 10.1371/journal.ppat.1006781. PubMed PMID: 29281732.
- 603 77. Tong X, Howley PM. The bovine papillomavirus E6 oncoprotein interacts with paxillin and  
604 disrupts the actin cytoskeleton. *Proc Natl Acad Sci U S A.* 1997;94(9):4412-7.
- 605 78. Wade R, Bohl J, Vande Pol S. Paxillin null embryonic stem cells are impaired in cell spreading and  
606 tyrosine phosphorylation of focal adhesion kinase. *Oncogene.* 2002;21(1):96-107.

- 607 79. Wade R, Vande Pol S. Minimal features of paxillin that are required for the tyrosine  
608 phosphorylation of focal adhesion kinase. *Biochem J.* 2006;393(Pt 2):565-73. PubMed PMID: 16253116.
- 609 80. White EA, Kramer RE, Tan MJ, Hayes SD, Harper JW, Howley PM. Comprehensive analysis of host  
610 cellular interactions with human papillomavirus E6 proteins identifies new E6 binding partners and  
611 reflects viral diversity. *J Virol.* 2012;86(24):13174-86. doi: 10.1128/JVI.02172-12. PubMed PMID:  
612 23015706; PMCID: 3503137.
- 613 81. Wade R, Brimer N, Vande Pol S. Transformation by bovine papillomavirus type 1 E6 requires  
614 paxillin. *J Virol.* 2008;82(12):5962-6. PubMed PMID: 18385245; PMCID: PMC2395150.
- 615 82. Proweller A, Tu L, Lepore JJ, Cheng L, Lu MM, Seykora J, Millar SE, Pear WS, Parmacek MS.  
616 Impaired notch signaling promotes de novo squamous cell carcinoma formation. *Cancer Res.*  
617 2006;66(15):7438-44. Epub 2006/08/04. doi: 66/15/7438 [pii]  
618 10.1158/0008-5472.CAN-06-0793. PubMed PMID: 16885339.
- 619 83. Alcolea MP, Jones PH. Cell competition: winning out by losing notch. *Cell Cycle.* 2015;14(1):9-17.  
620 Epub 2015/01/01. doi: 10.4161/15384101.2014.988027. PubMed PMID: 25551772; PMCID:  
621 PMC4352972.
- 622



Fig. 1

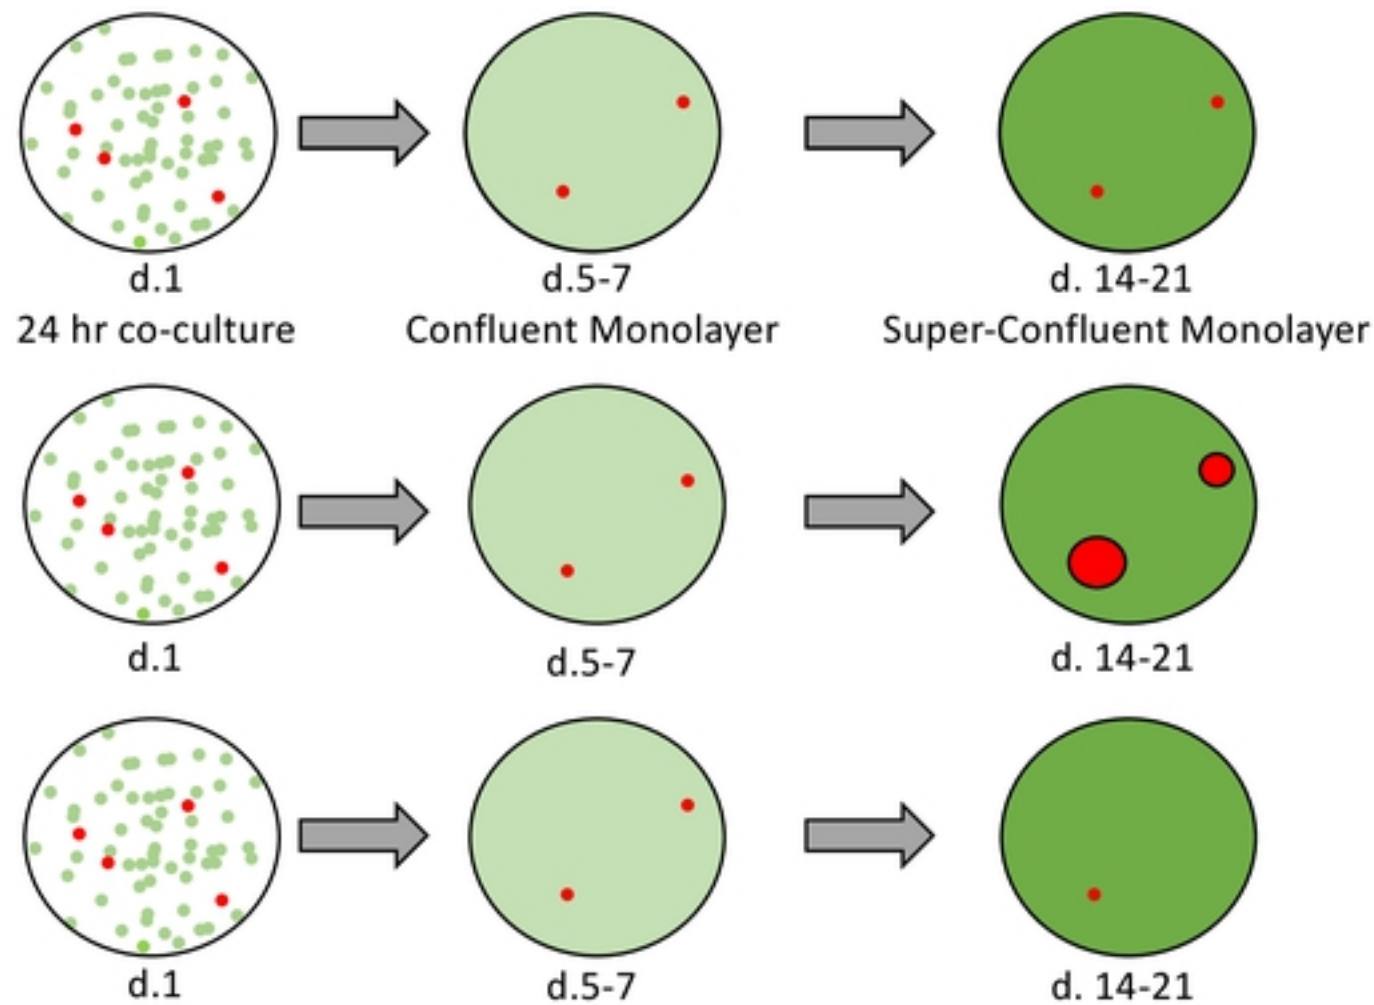

**Red = green** competition, then red colonies do not expand at the expense of the green colonies.

**Red > green** competition, then red colonies expand at the expense of the green colonies.

**Green > red** competition, then red colonies may be eliminated or made small.

Figure 1

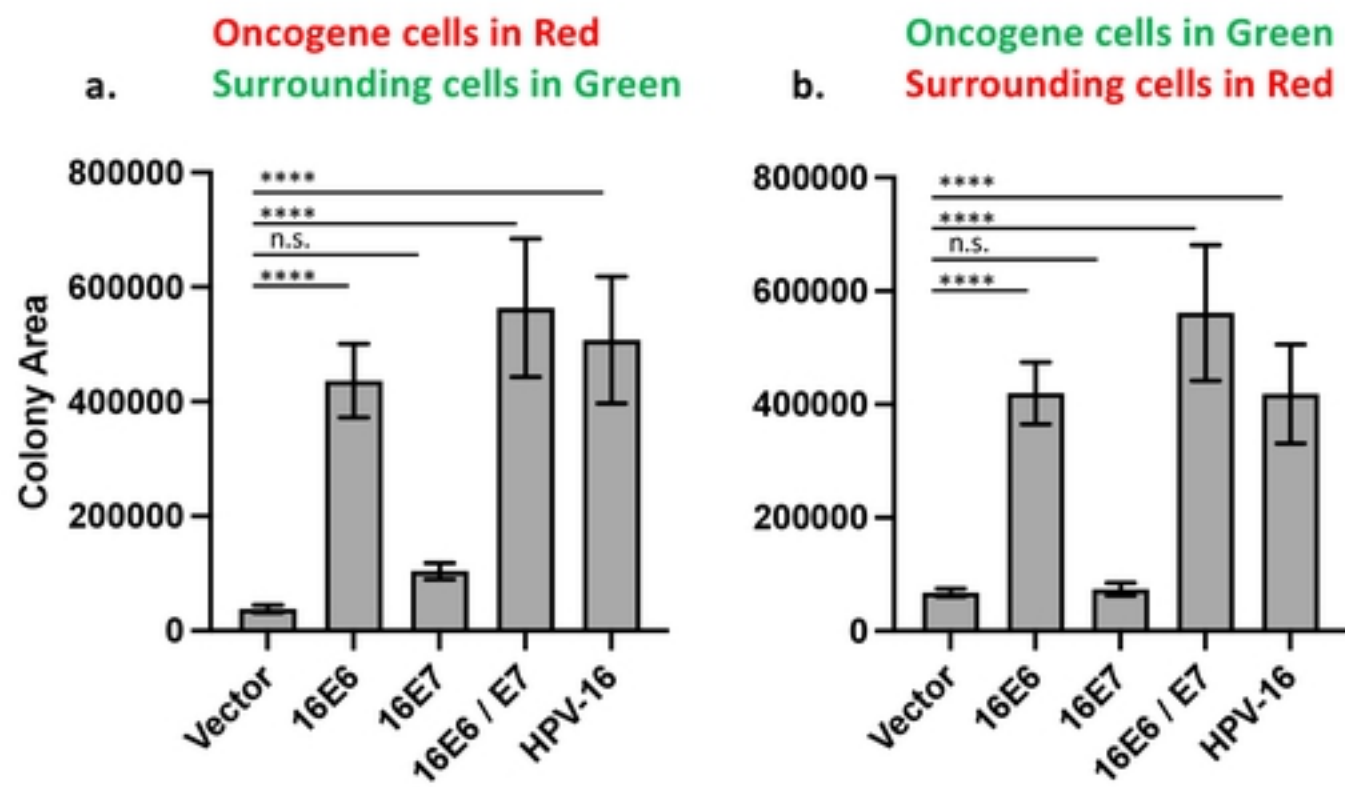

Figure 3

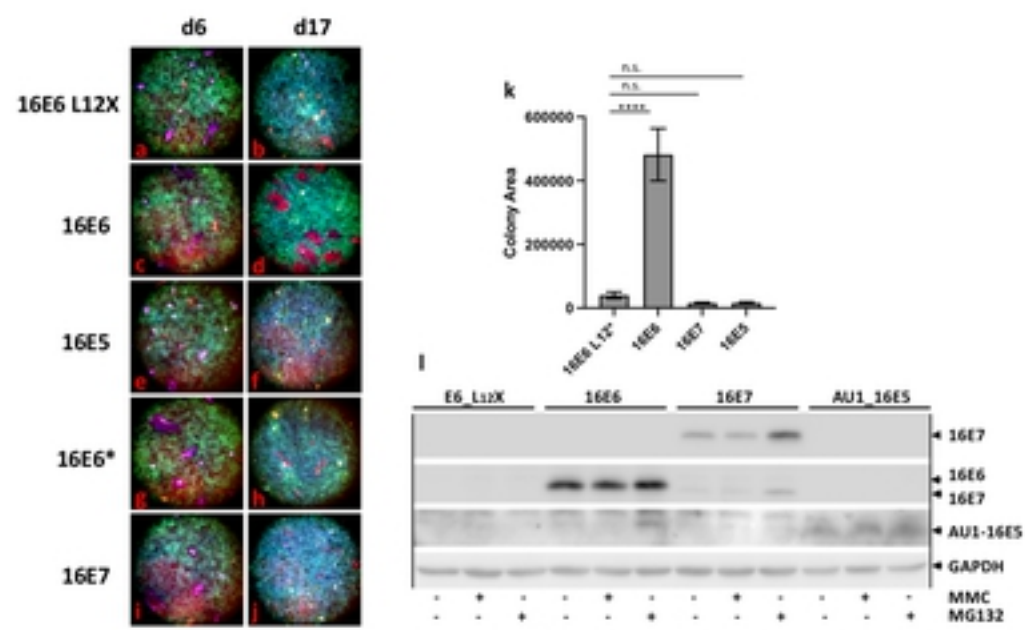

Figure 5

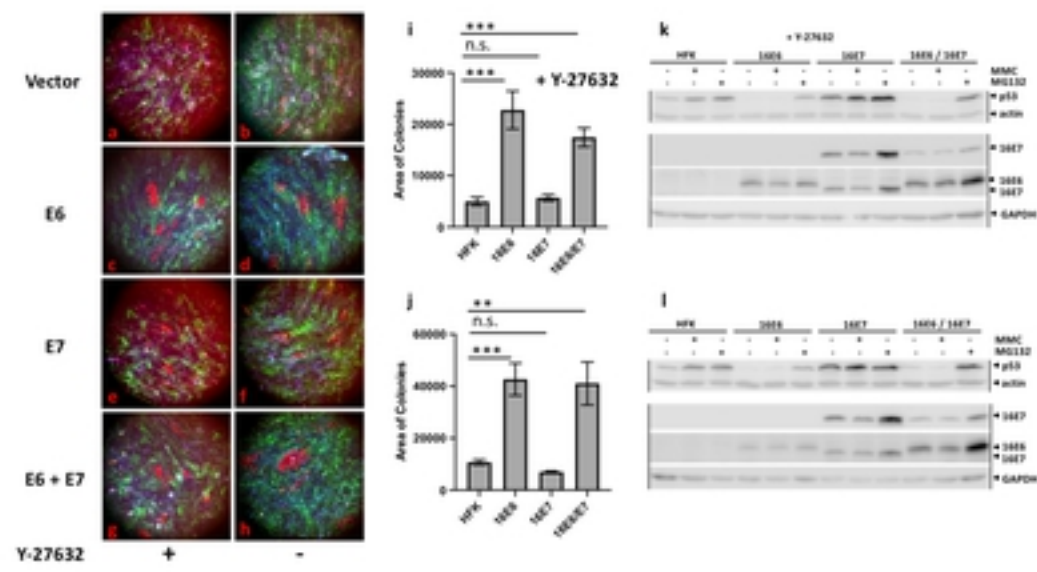

Figure 6

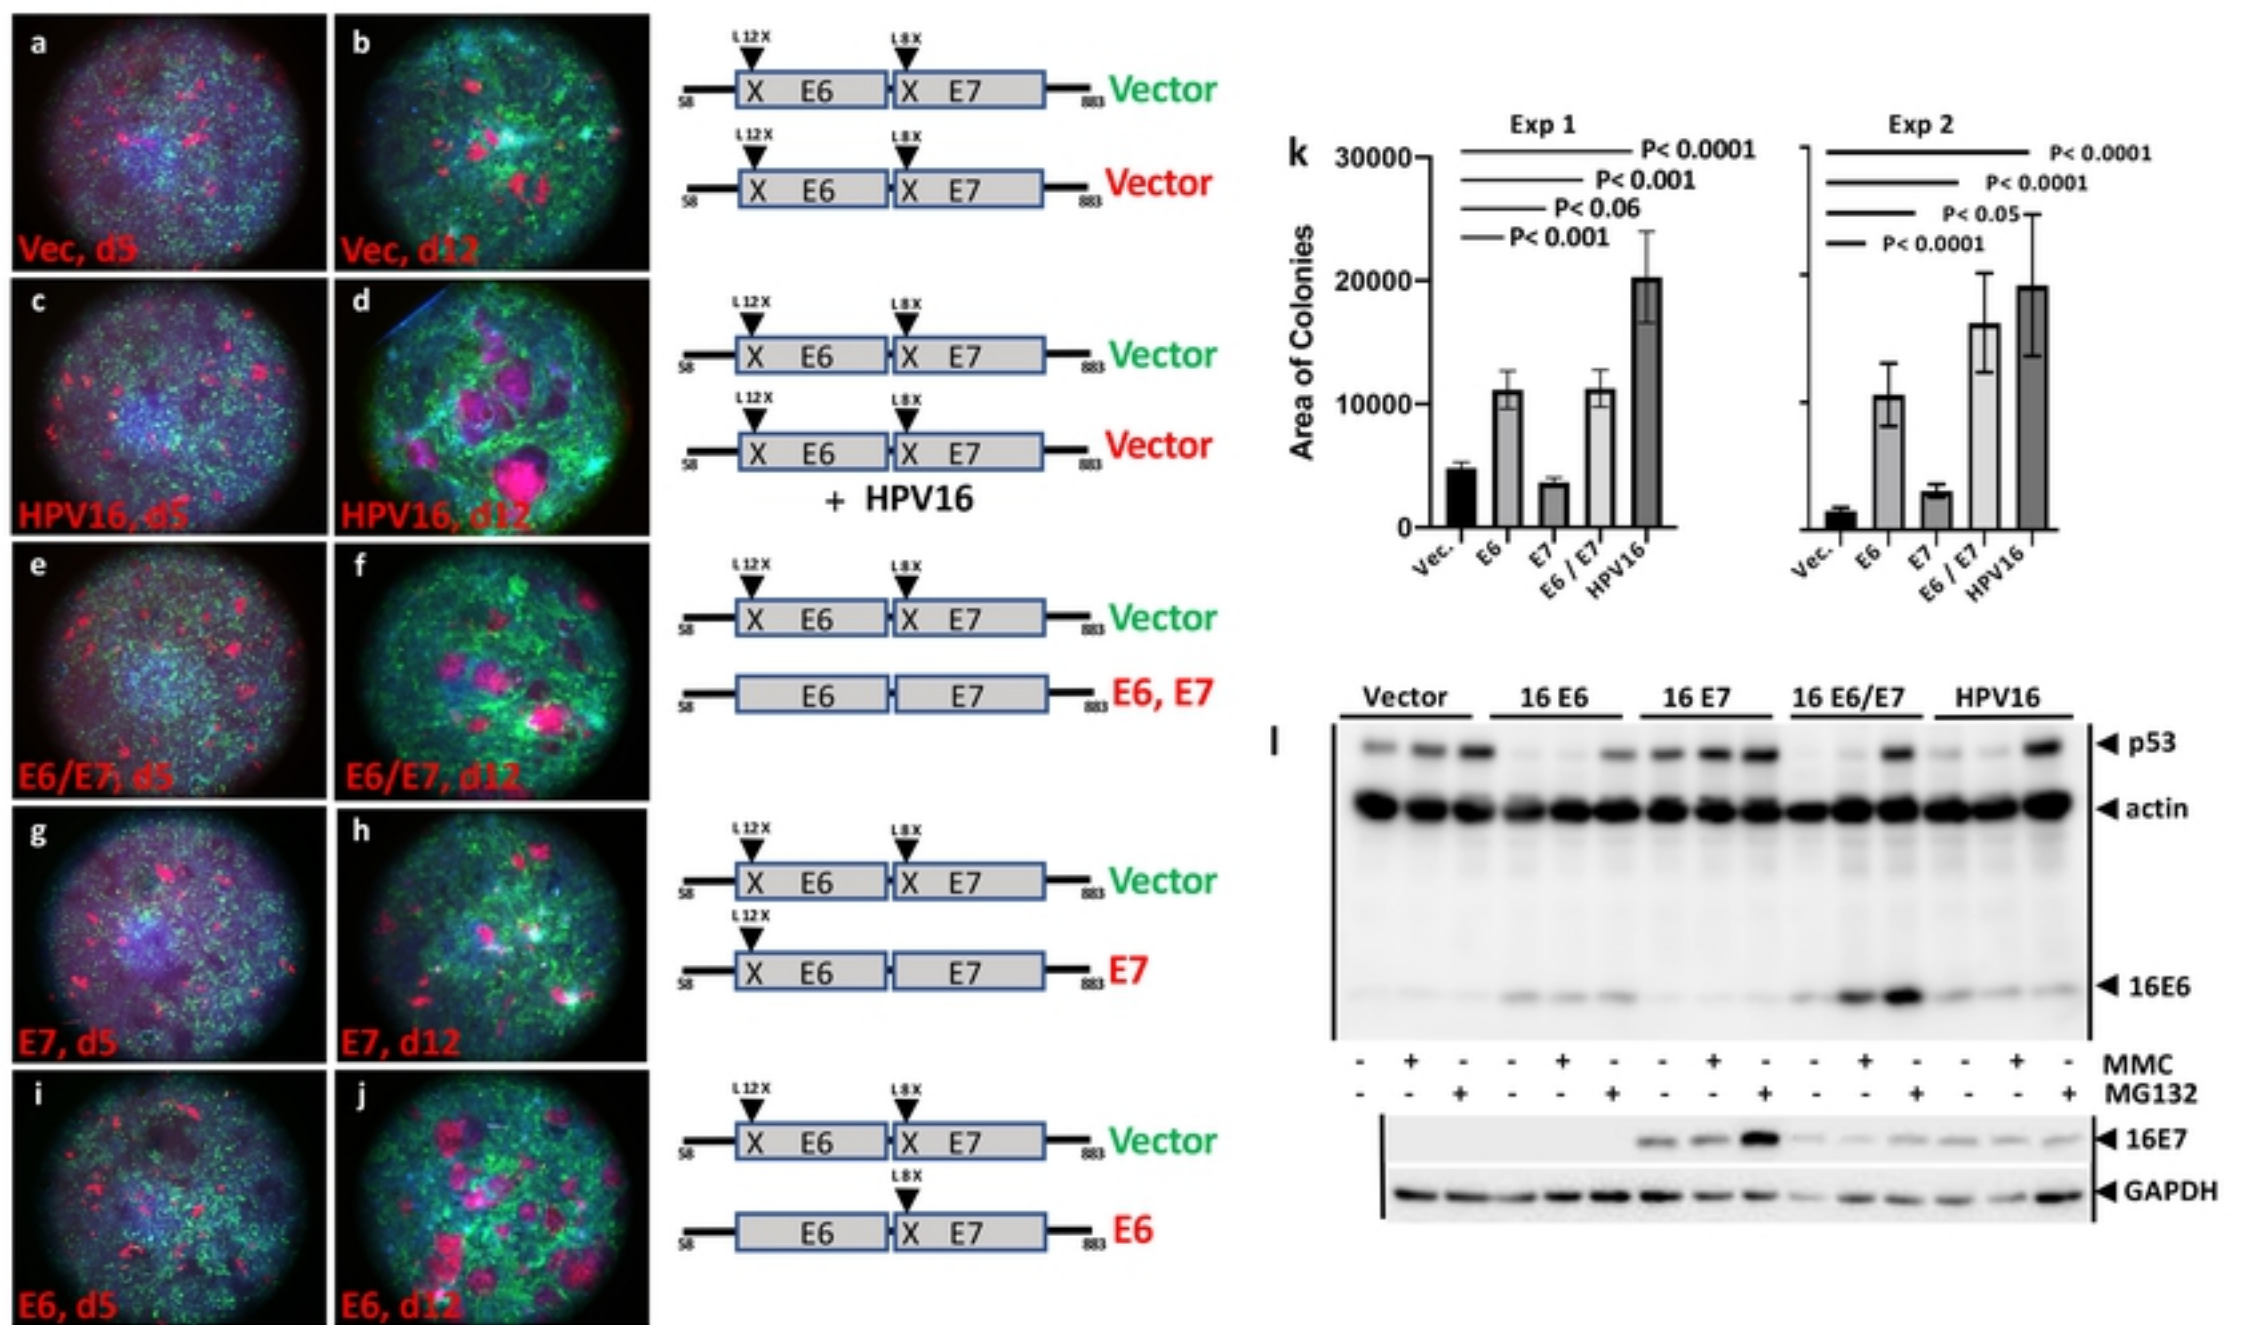

Fig. 2.tif

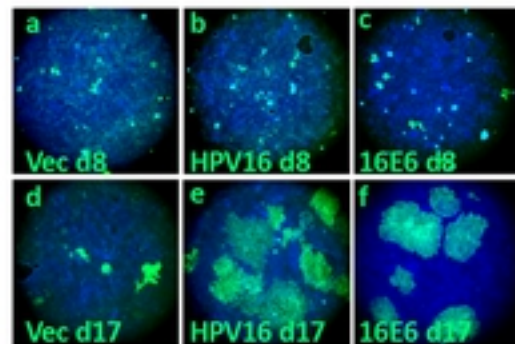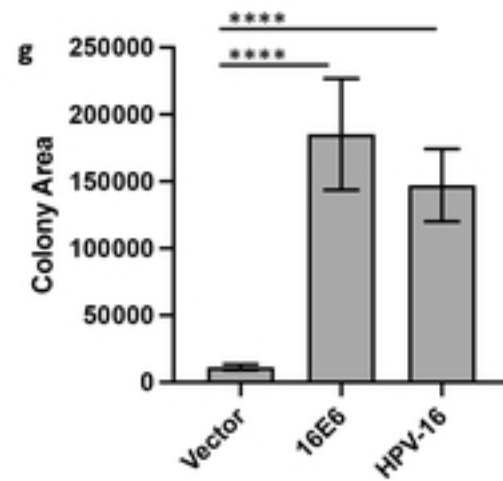

Fig. 4.tif
